# Supplementary material
Source: PubMed Central journal article supplement (PMC8351325)
Supplement: NIHMS1723082-supplement-Supp_Table_1_-_ADHD_med_and_retention.pdf [file NIHMS1723082-supplement-Supp_Table_1_-_ADHD_med_and_retention.pdf]

|                                       | <b>HR</b> | <b>95%-CI</b> | <b>p value</b> |
|---------------------------------------|-----------|---------------|----------------|
| <b>ADHD medication</b>                | 0.59      | 0.40 - 0.87   | 0.008*         |
| <b>buprenorphine therapy</b>          | 0.97      | 0.59 - 1.60   | 0.902          |
| <b>cocaine use disorder</b>           | 1.20      | 0.71 - 2.02   | 0.498          |
| <b>alcohol use disorder</b>           | 0.78      | 0.46 - 1.33   | 0.366          |
| <b>opioid use disorder</b>            | 1.05      | 0.56 - 1.89   | 0.863          |
| <b>cannabis use disorder</b>          | 1.17      | 0.64 - 2.14   | 0.605          |
| <b>benzodiazepine use disorder</b>    | 0.64      | 0.30 - 1.37   | 0.249          |
| <b>other stimulant</b>                | 0.83      | 0.48 - 1.43   | 0.503          |
| <b>bipolar disorder</b>               | 0.66      | 0.36 - 1.21   | 0.176          |
| <b>depressive disorder</b>            | 0.75      | 0.46 - 1.22   | 0.247          |
| <b>anxiety disorder</b>               | 0.79      | 0.50 - 1.24   | 0.299          |
| <b>post-traumatic stress disorder</b> | 0.87      | 0.52 - 1.45   | 0.587          |
| <b>female sex assigned at birth</b>   | 1.14      | 0.69 - 1.89   | 0.597          |
| <b>no insurance</b>                   | 0.49      | 0.15 - 1.64   | 0.249          |
| <b>private insurance</b>              | 0.69      | 0.42 - 1.14   | 0.147          |

Supplemental Table 1. Covariates included in regression analysis predicting treatment duration. Hazard ratios (HR), 95%-CI, and p-values are reported for each measured covariate. Of measured covariates, ADHD medication alone significantly affects duration of treatment. \* indicates significance at alpha = 0.05.
